# Supplementary material for: G6PD deficiency in Latin America: systematic review on prevalence and variants
Source: PubMed Central journal article supplement — Mem Inst Oswaldo Cruz. 2014 Aug 19;109(5):553–68. doi: 10.1590/0074-0276140123 (PMC4156449; doi:10.1590/0074-0276140123), 2014-08-19
Supplement: 0074-0276-mioc-109-5-0553-s01.pdf [file 0074-0276-mioc-109-5-0553-s01.pdf]

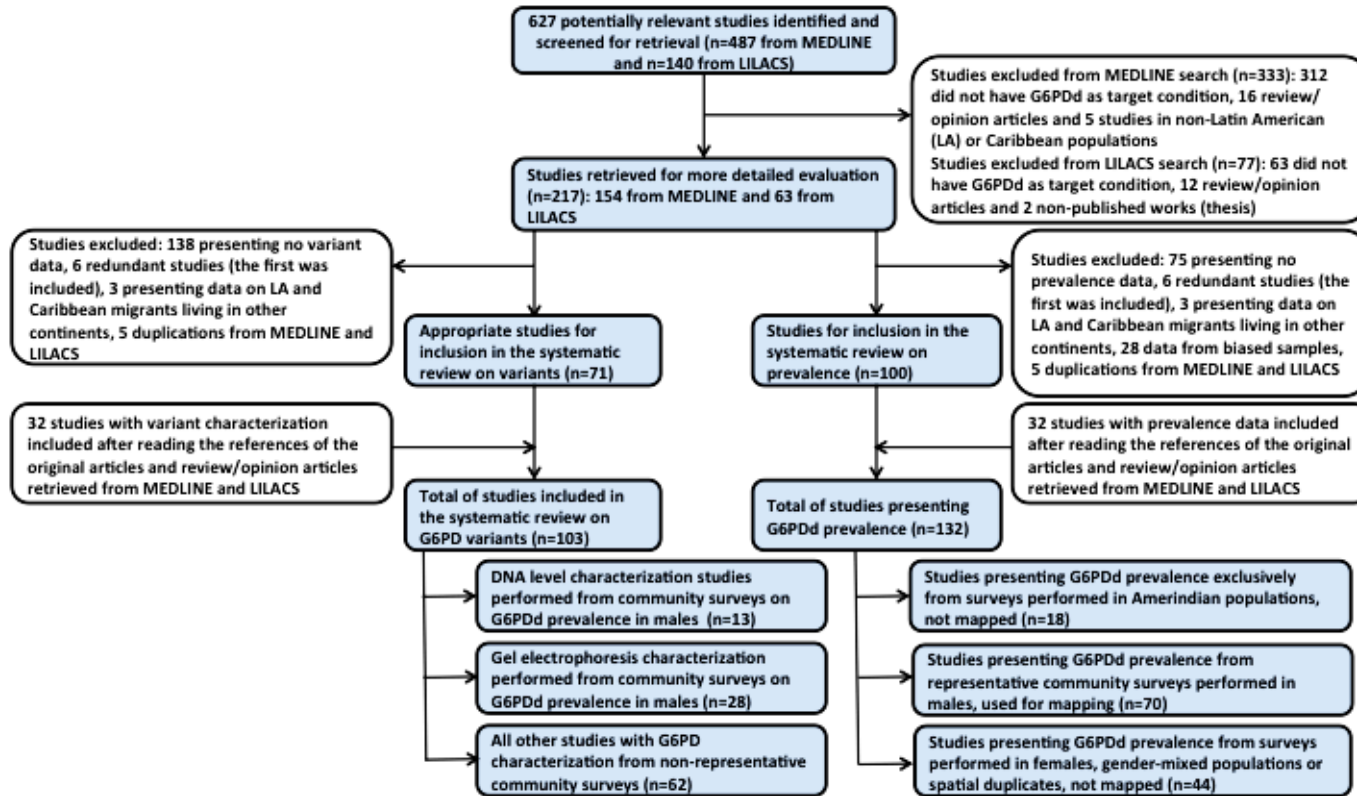

Flow chart of inclusion of studies reporting information on glucose-6-phosphate dehydrogenase deficient (G6PDd) from LA and Caribbean countries.
